# Supplementary material for: Exploration of carvacrol aggregation by laser spectroscopy
Source: Royal Society of Chemistry journal article supplement (doi:10.1039/d4cp02945c), 2024-01-01
Supplement: d4cp02945c1.pdf [file d4cp02945c1.pdf]

## Electronic supplementary information (ESI) for:

### Exploration of Carvacrol Aggregation by Laser Spectroscopy.

Paúl Pinillos,<sup>†,a</sup> Fernando Torres-Hernández,<sup>†,a</sup> Imanol Usabiaga,<sup>a</sup> Pablo Pinacho,<sup>\*,a</sup> José A. Fernández<sup>\*,a</sup>

<sup>a</sup> Department of Physical Chemistry, Faculty of Science and Technology, University of the Basque Country (UPV/EHU), B° Sarriena, S/N, Leioa, 48940, Spain.

<sup>†</sup> Shared first authors

\* E-mail: [pablo.pinacho@ehu.eus](mailto:pablo.pinacho@ehu.eus)

\* E-mail: [josea.fernandez@ehu.eus](mailto:josea.fernandez@ehu.eus)

#### Table of Contents:

|                    |                                                                                                                                 |     |
|--------------------|---------------------------------------------------------------------------------------------------------------------------------|-----|
| <b>Scheme S1.</b>  | Carvacrol (carOH) and other related systems.                                                                                    | S2  |
| <b>Figure S1.</b>  | Ball and stick representation of the four carOH isomers.                                                                        | S2  |
| <b>Figure S2.</b>  | Experimental and simulated IDIR spectra for the four carOH isomers.                                                             | S3  |
| <b>Figure S3.</b>  | UV/UV and IR/UV hole burning of carOH.                                                                                          | S4  |
| <b>Figure S4.</b>  | Summary of the predicted geometry of carOH...w isomers.                                                                         | S4  |
| <b>Figure S5.</b>  | Experimental and simulated IDIRS spectra for four representative carOH...w isomers.                                             | S5  |
| <b>Figure S6.</b>  | Summary of the predicted geometry of (carOH) <sub>2</sub> isomers.                                                              | S6  |
| <b>Figure S7.</b>  | Experimental and simulated IDIRS spectra for four representative (carOH) <sub>2</sub> isomers.                                  | S7  |
| <b>Figure S8.</b>  | Experimental and simulated IDIRS spectra for four representative (carOH) <sub>3</sub> isomers.                                  | S8  |
| <b>Figure S9.</b>  | Experimentally observed trimers for carvacrol, 1-naphthol, phenol, propofol, cyclohexanol, benzyl alcohol, and 2-phenylethanol. | S9  |
| <b>Figure S10.</b> | NCI plots for the four carOH isomers.                                                                                           | S9  |
| <b>Figure S11.</b> | NCI plots for four representative carOH...w isomers.                                                                            | S10 |
| <b>Figure S12.</b> | NCI plots for four representative (carOH) <sub>2</sub> isomers.                                                                 | S10 |
| <b>Figure S13.</b> | NCI plots for four representative (carOH) <sub>3</sub> isomers.                                                                 | S11 |

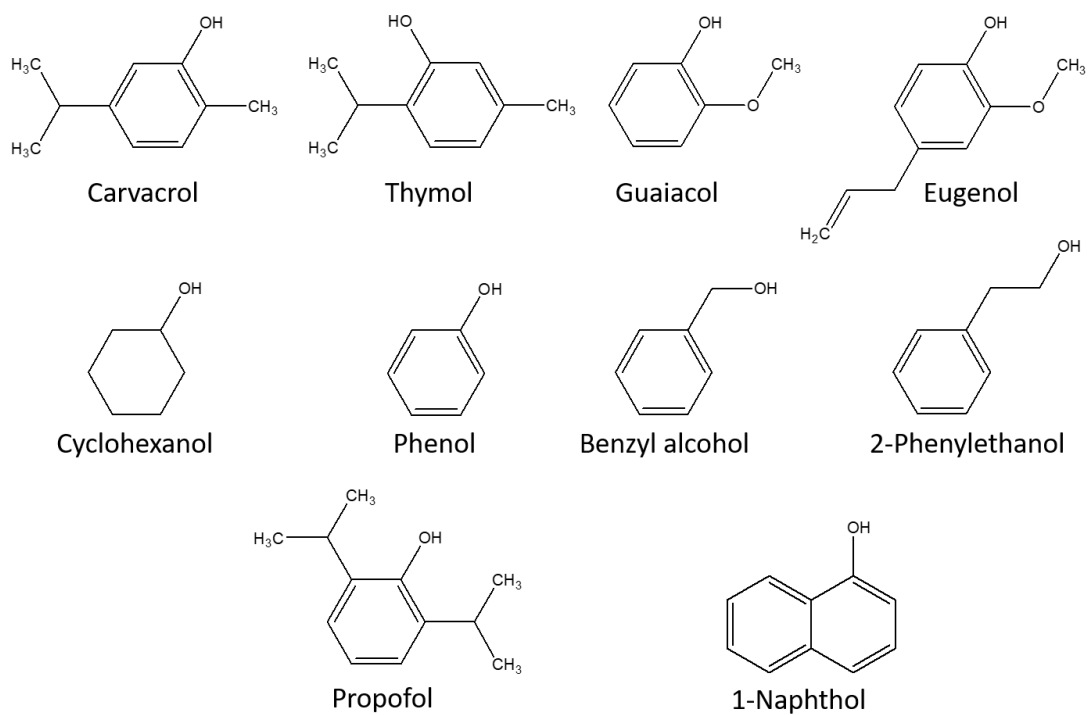

**Scheme S1.** Carvacrol (carOH) and other related systems mentioned in the main text of the manuscript.

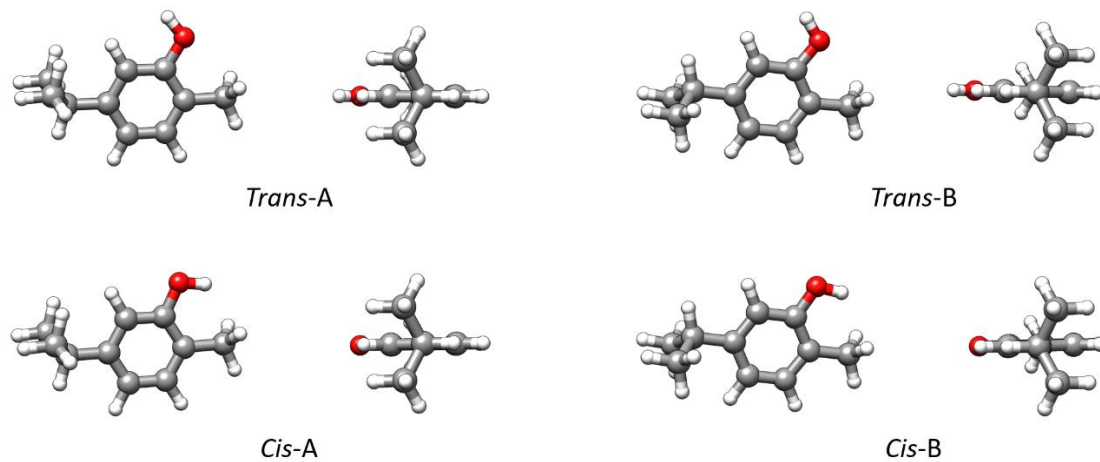

**Figure S1.** Ball and stick representation of the four carOH isomers.

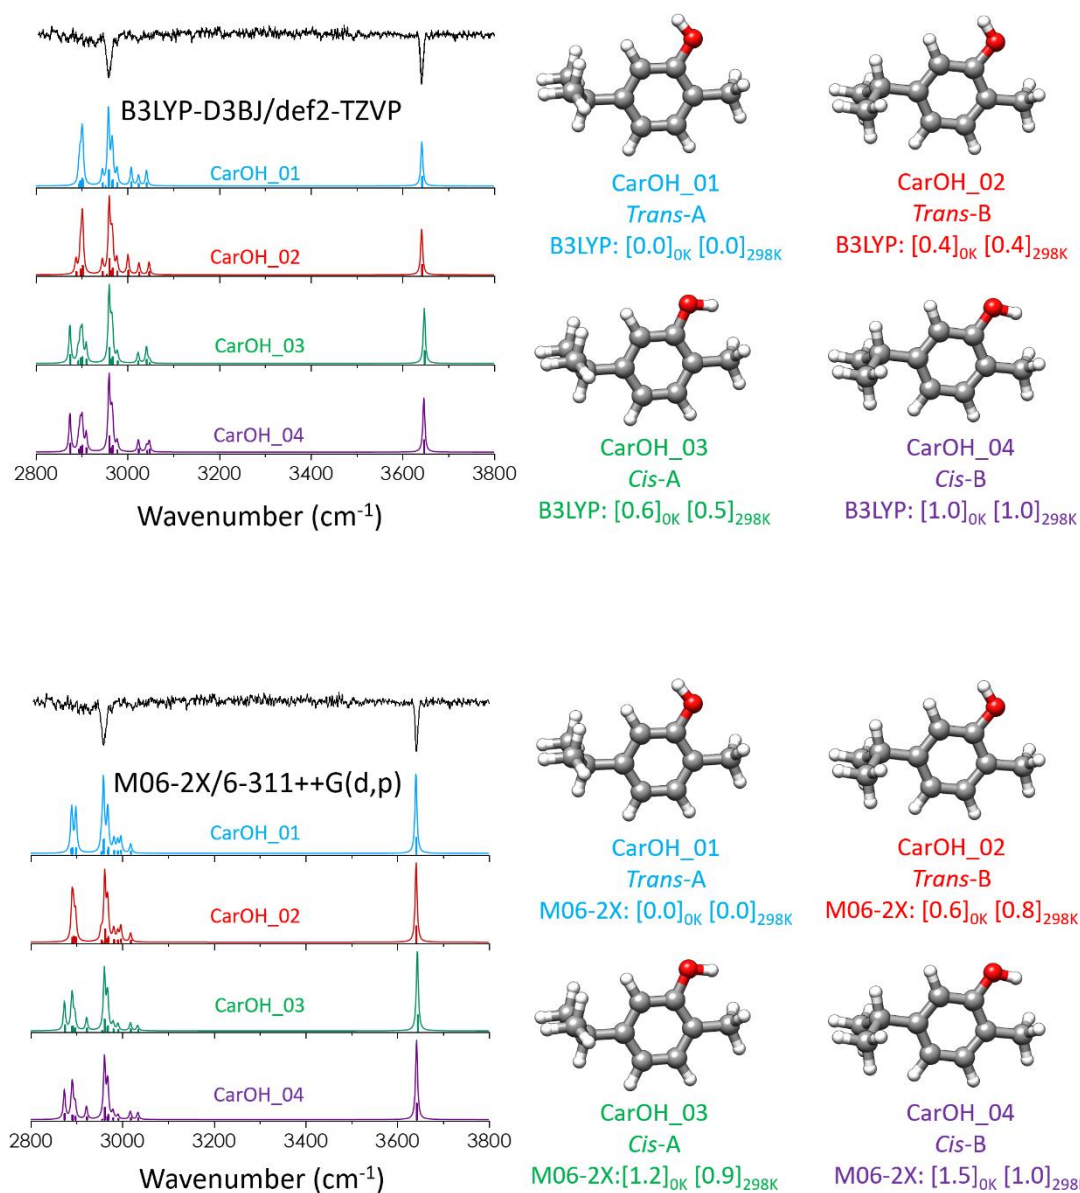

**Figure S2.** Experimental (black trace) and simulated (coloured traces) IDIR spectra for the four carOH isomers. The simulations were done based on a) B3LYP-D3BJ/def2-TZVP structures using a scaling factor of 0.957; and on b) M06-2X/6-311++G(d,p) structures using scaling factors of 0.946 and 0.932 for CH and OH stretching modes, respectively, to account for anharmonicity. The Gibbs free energies (kJ·mol<sup>-1</sup>) are given at the B3LYP-D3BJ/def2-TZVP and M06-2X/6-311++G(d,p) levels of theory at 0 and 298 K. Panel b) is reproduced from Figure 2 from the main text for a better comparison of the simulations.

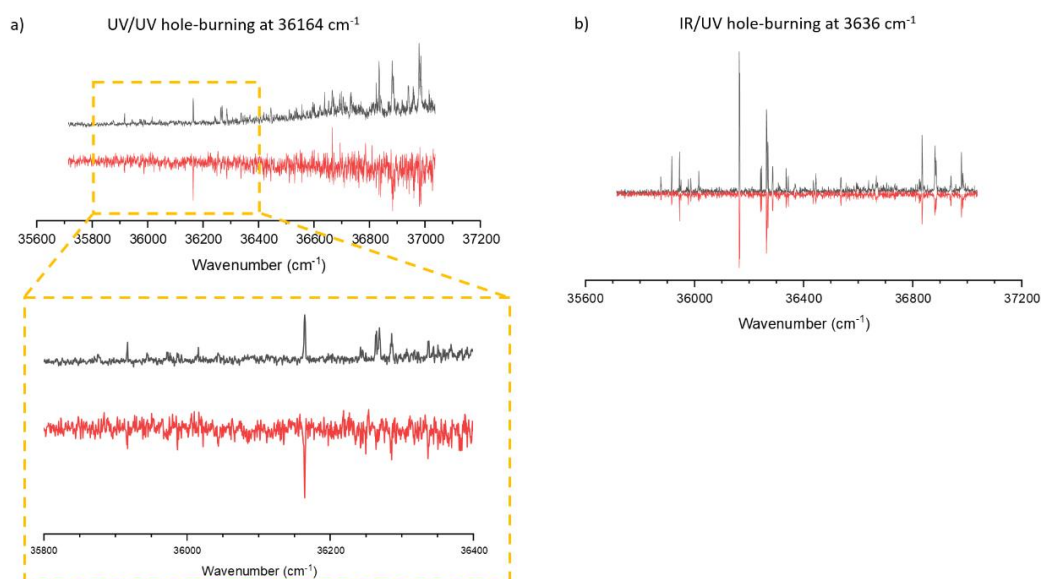

**Figure S3.** a) UV/UV and b) IR/UV hole burning spectra of carOH recorded probing the transitions at 36164, and 3636  $\text{cm}^{-1}$  respectively.

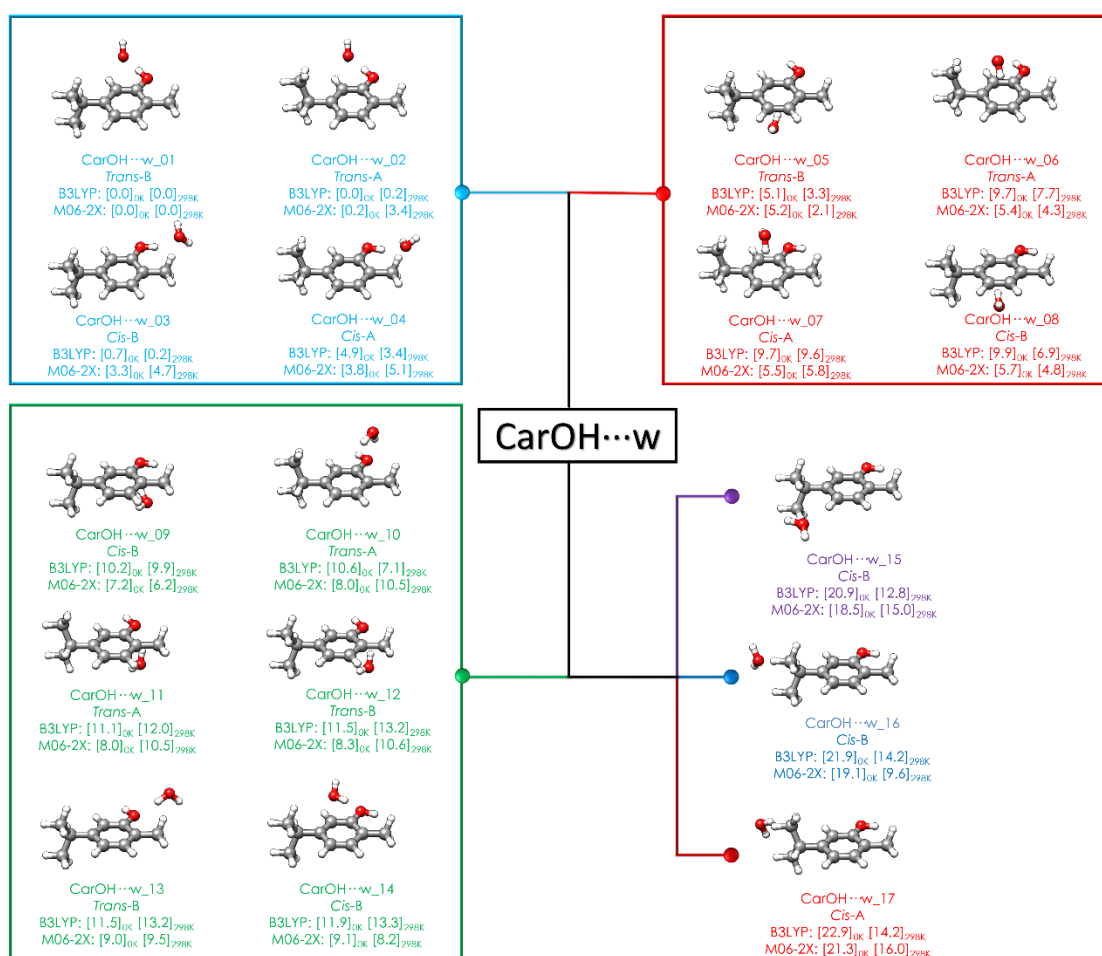

**Figure S4.** Summary of optimized geometries of carOH···w isomers with their relative energy values ( $\text{kJ}\cdot\text{mol}^{-1}$ ) at the B3LYP-D3BJ/def2-TZVP and M06-2X/6-311++G(d,p) levels at 0 and 298 K. All energies are BSSE and ZPE corrected. The conformers are grouped in families according to their interactions as explained in the main text.

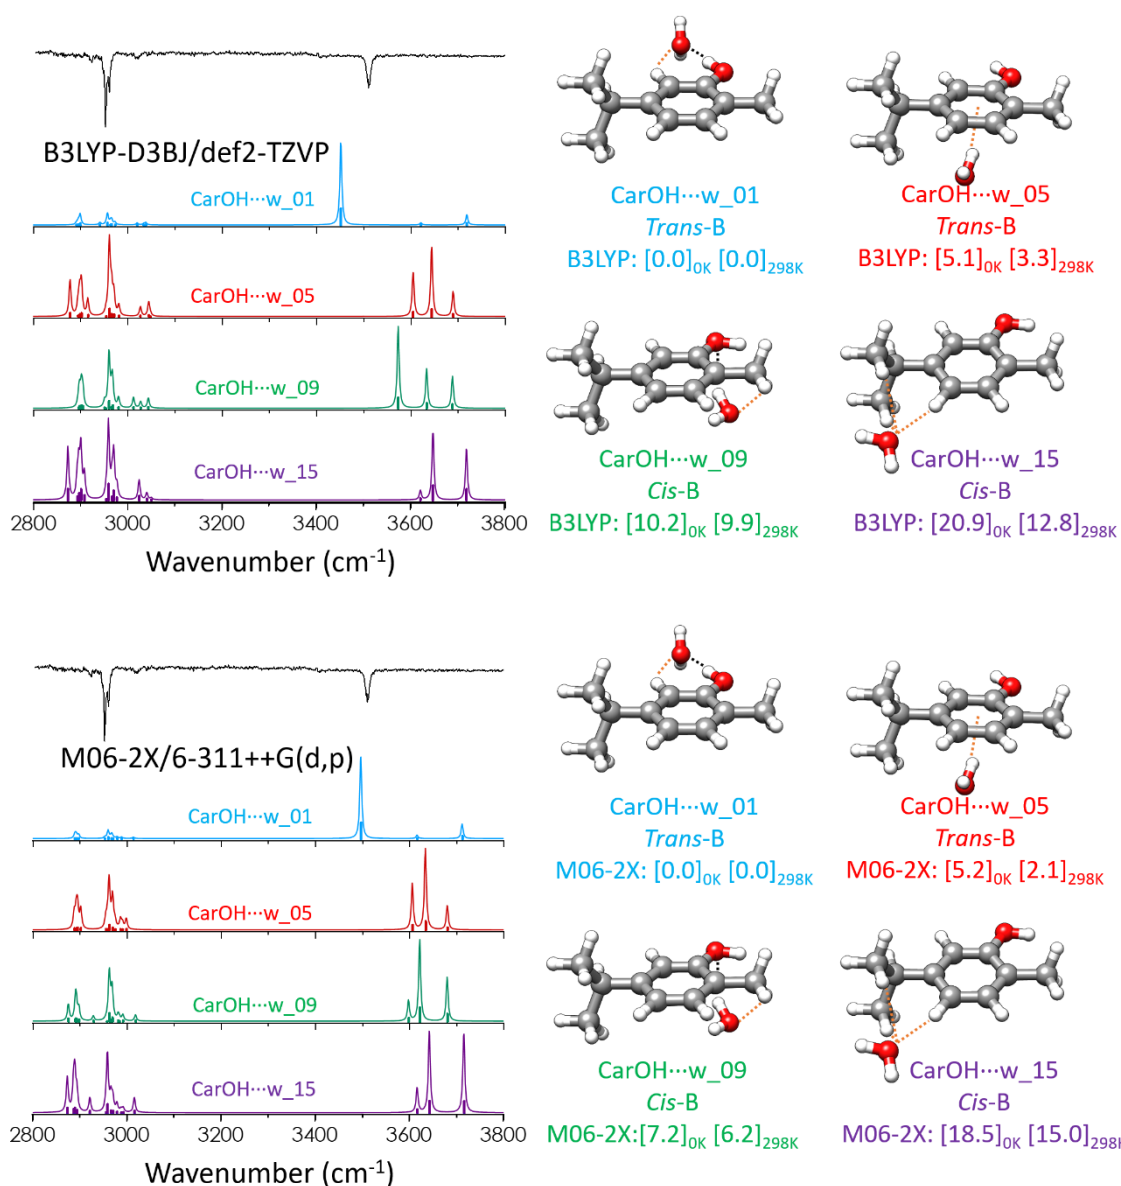

**Figure S5.** Experimental (black trace) and simulated (coloured traces) IDIR spectra for four representative carOH...w isomers, one from each family of interactions (Figure S4). The simulations were done based on a) B3LYP-D3BJ/def2-TZVP structures using a scaling factor of 0.957; and on b) M06-2X/6-311++G(d,p) structures using scaling factors of 0.946 and 0.932 for CH and OH stretching modes, respectively, to account for anharmonicity. The Gibbs free energies ( $\text{kJ}\cdot\text{mol}^{-1}$ ) are given at both levels of theory at 0 and 298 K. Panel b) is reproduced from Figure 3 from the main text for a better comparison of the simulations.

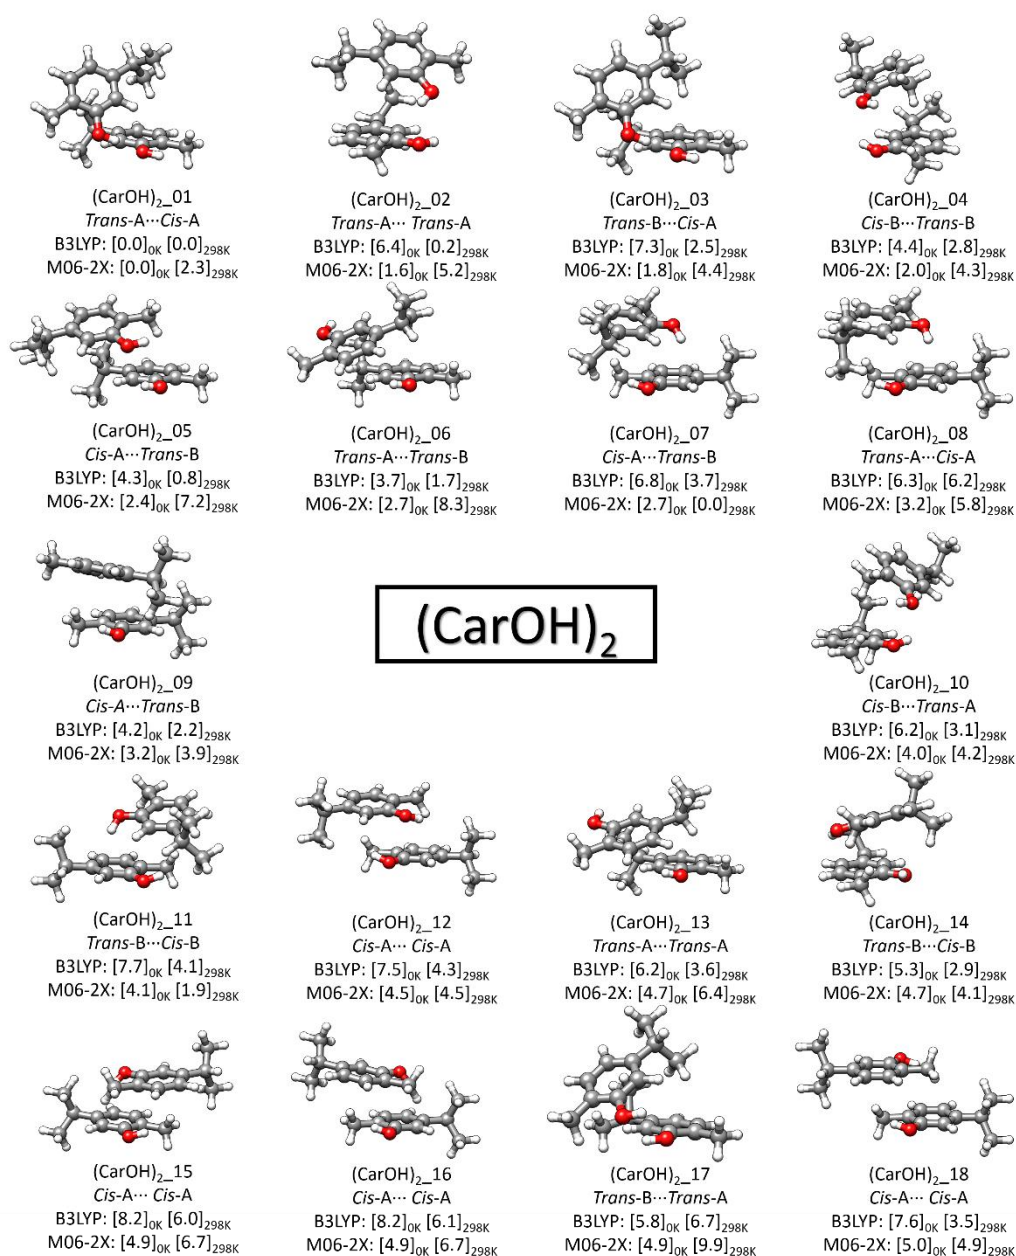

**Figure S6.** Summary of the optimized geometries of (carOH)<sub>2</sub> isomers with their relative energy values (kJ·mol<sup>-1</sup>) at the B3LYP-D3BJ/def2-TZVP and M06-2X/6-311++G(d,p) levels at 0 and 298 K. All energies are BSSE and ZPE corrected.



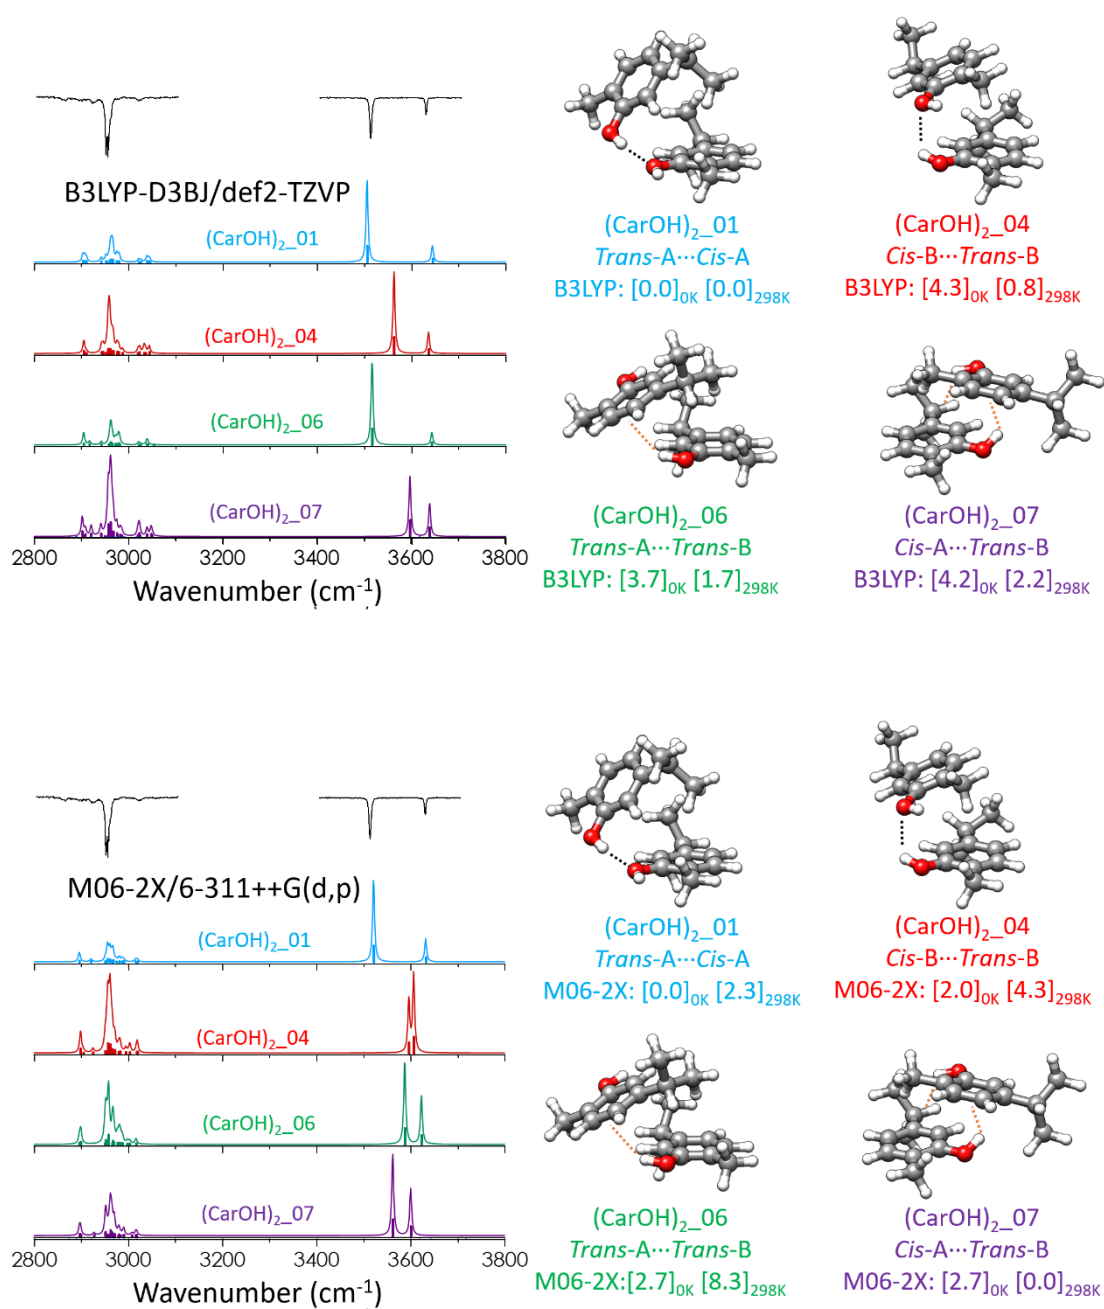

**Figure S7.** Experimental (black trace) and simulated (coloured traces) IDIR spectra for four representative (carOH)<sub>2</sub> isomers. The simulations were done based on a) B3LYP-D3BJ/def2-TZVP structures using a scaling factor of 0.957; and on b) M06-2X/6-311++G(d,p) structures using scaling factors of 0.946 and 0.932 for CH and OH stretching modes, respectively, to account for anharmonicity. The Gibbs free energies (kJ·mol<sup>-1</sup>) are given at both levels of theory at 0 and 298 K. Panel b) is reproduced from Figure 4 from the main text for a better comparison of the simulations.

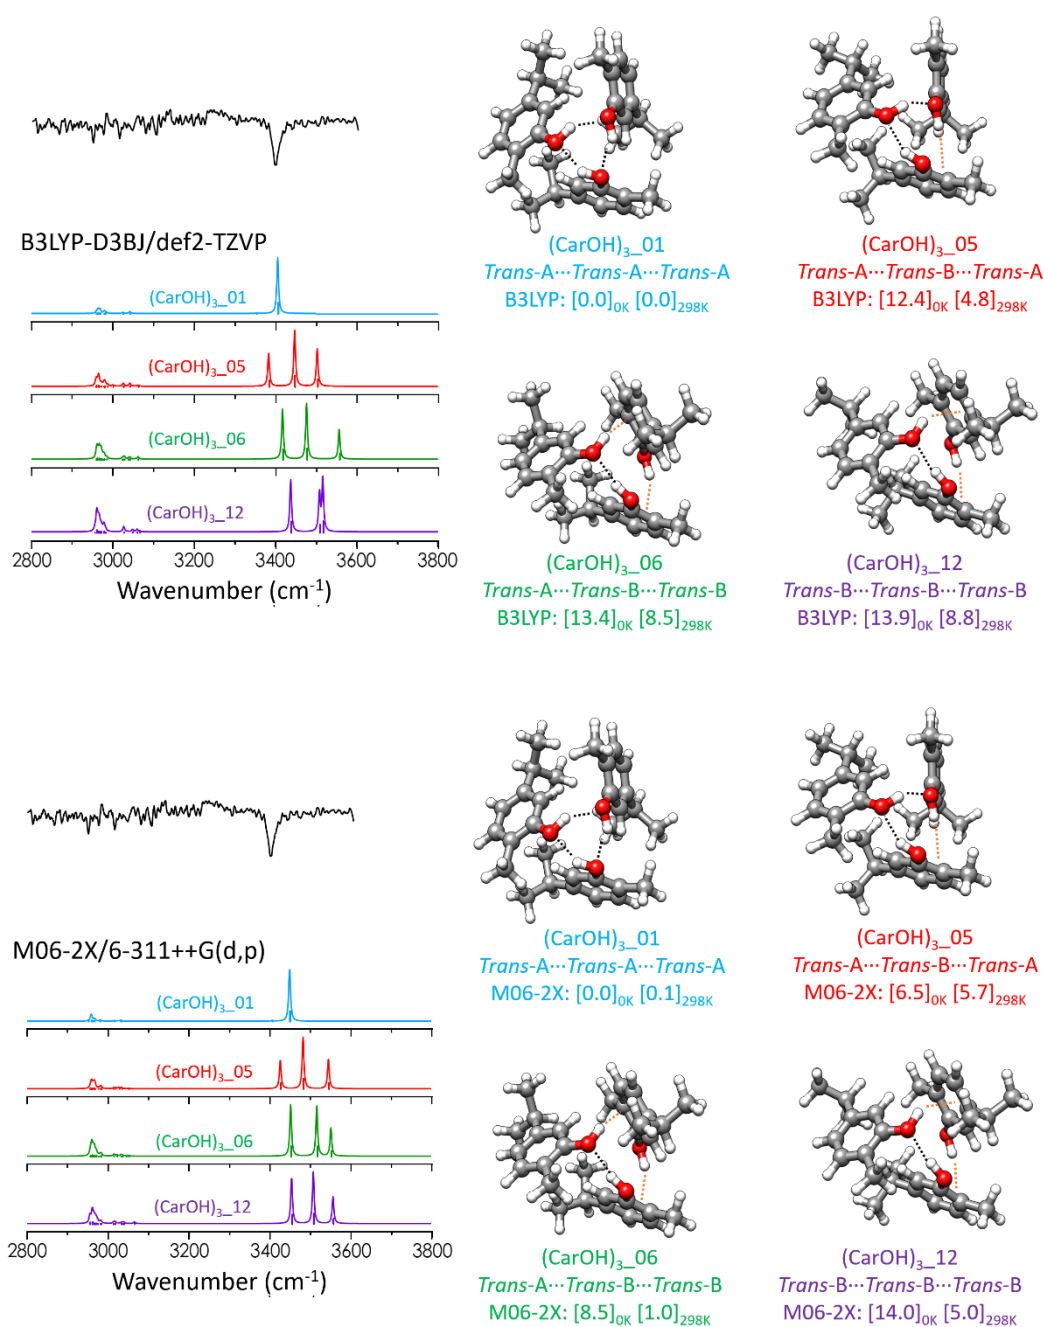

**Figure S8.** Experimental (black trace) and simulated (coloured traces) IDIR spectra for four representative (carOH)<sub>3</sub> isomers. The simulations were done based on a) B3LYP-D3BJ/def2-TZVP structures using a scaling factor of 0.957; and on b) M06-2X/6-311++G(d,p) structures using scaling factors of 0.946 and 0.932 for CH and OH stretching modes, respectively, to account for anharmonicity. The Gibbs free energies (kJ·mol<sup>-1</sup>) are given at both levels of theory at 0 and 298 K. Panel b) is reproduced from Figure 5 from the main text for a better comparison of the simulations.



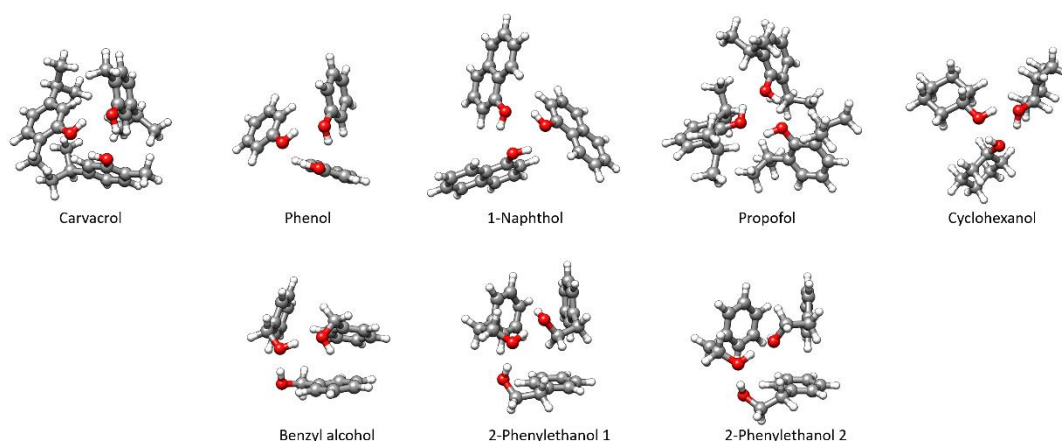

**Figure S9.** Experimentally observed trimers for carvacrol, 1-naphthol, phenol, propofol, cyclohexanol, benzyl alcohol, and 2-phenylethanol. The input geometry for each trimer was taken from the respective references and re-optimized at B3LYP-D3BJ/def2-TZVP, to display all of them at the same level of theory. The structures in the first row show five trimers having three hydrogen bonding each, in a cyclic arrangement. The trimer structures in the second row feature two hydrogen bonds and an OH $\cdots$  $\pi$  interaction.

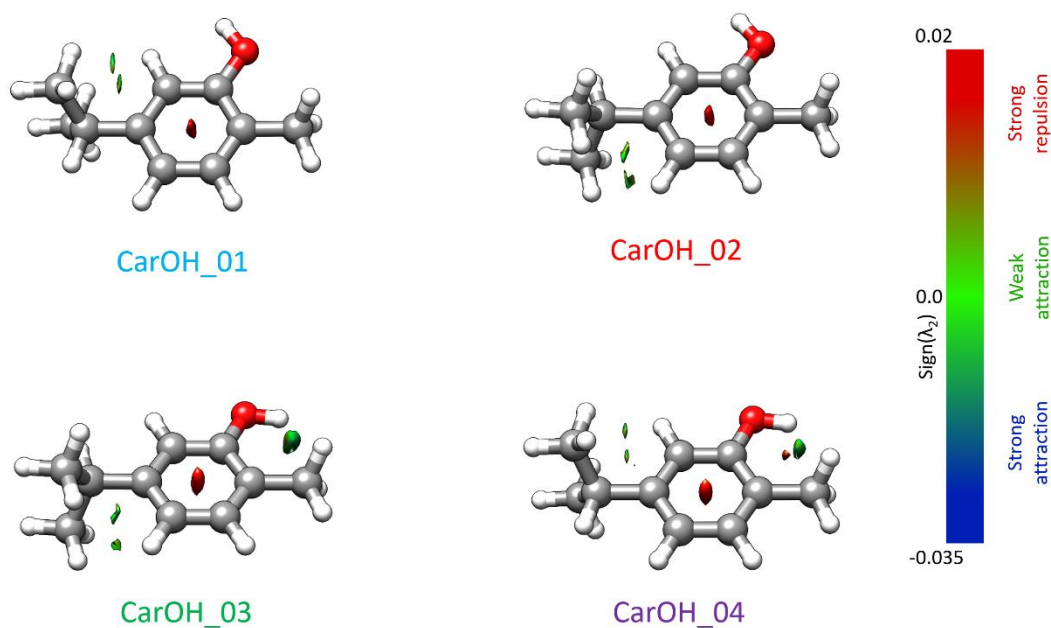

**Figure S10.** NCI plots for the four carOH isomers.  $\lambda_2$  is the second eigenvalue of the electron density Hessian matrix. Its value indicates the type and strength of the interactions. Positive values (red areas) are associated with strong repulsions; negative values (blue areas) are associated with strong attractions; while values close to 0 (green surfaces) indicate the presence of weak interactions. Please note that the colour bar scale is not linear.

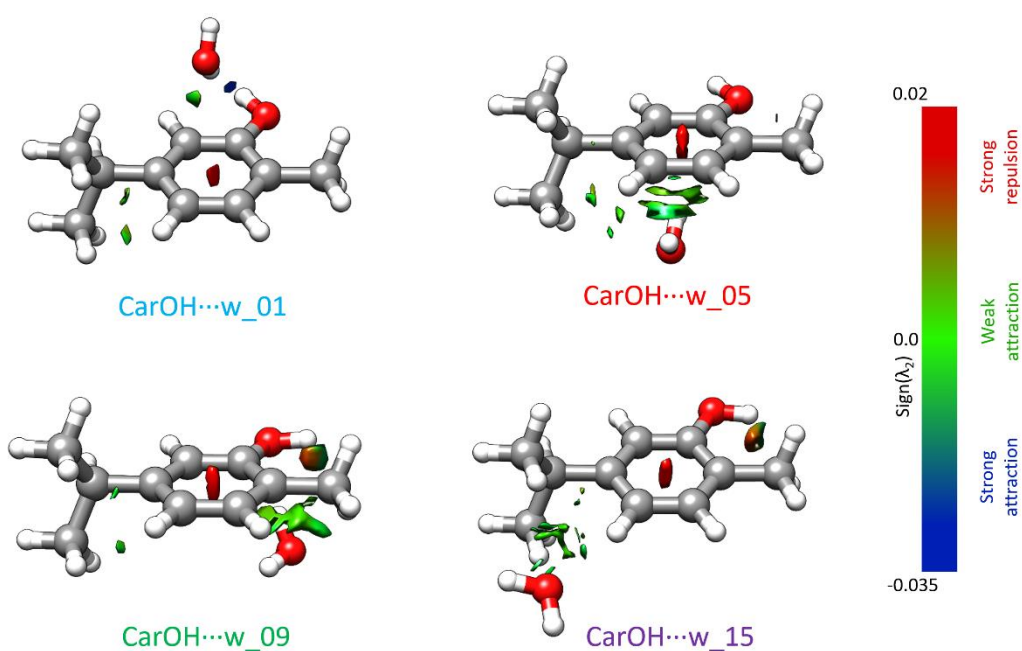

**Figure S11.** NCI plots for four representative carOH...w isomers.  $\lambda_2$  is the second eigenvalue of the electron density Hessian matrix. Its value indicates the type and strength of the interactions. Positive values (red areas) are associated with strong repulsions; negative values (blue areas) are associated with strong attractions; while values close to 0 (green surfaces) indicate the presence of weak interactions. Please note that the colour bar scale is not linear.

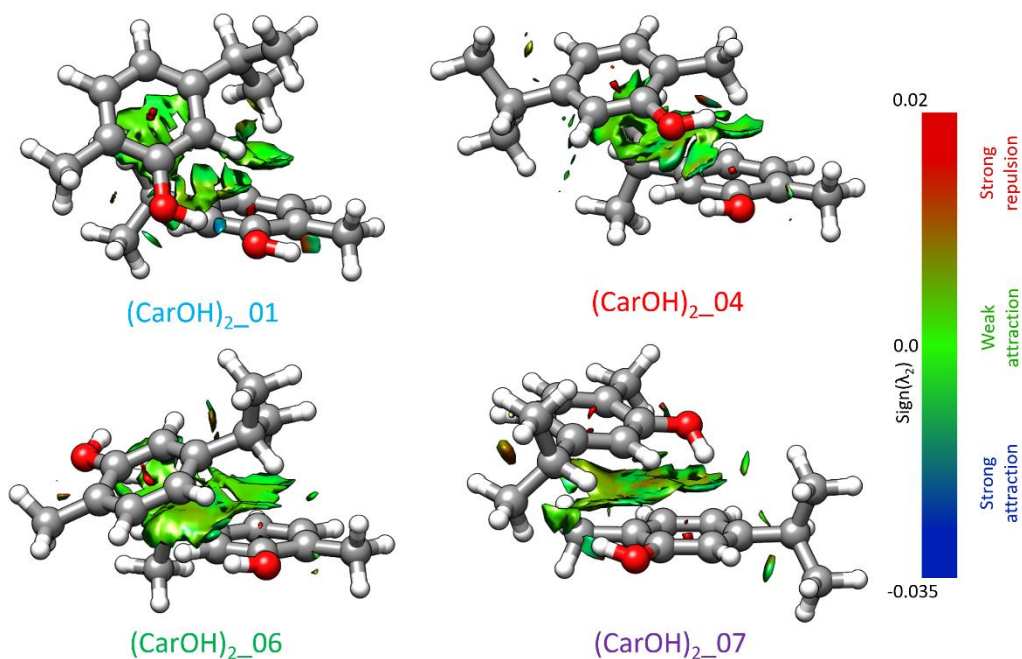

**Figure S12.** NCI plots for four representative (carOH)<sub>2</sub> isomers.  $\lambda_2$  is the second eigenvalue of the electron density Hessian matrix. Its value indicates the type and strength of the interactions. Positive values (red areas) are associated with strong repulsions; negative values (blue areas) are associated with strong attractions; while values close to 0 (green surfaces) indicate the presence of weak interactions. Please note that the colour bar scale is not linear.

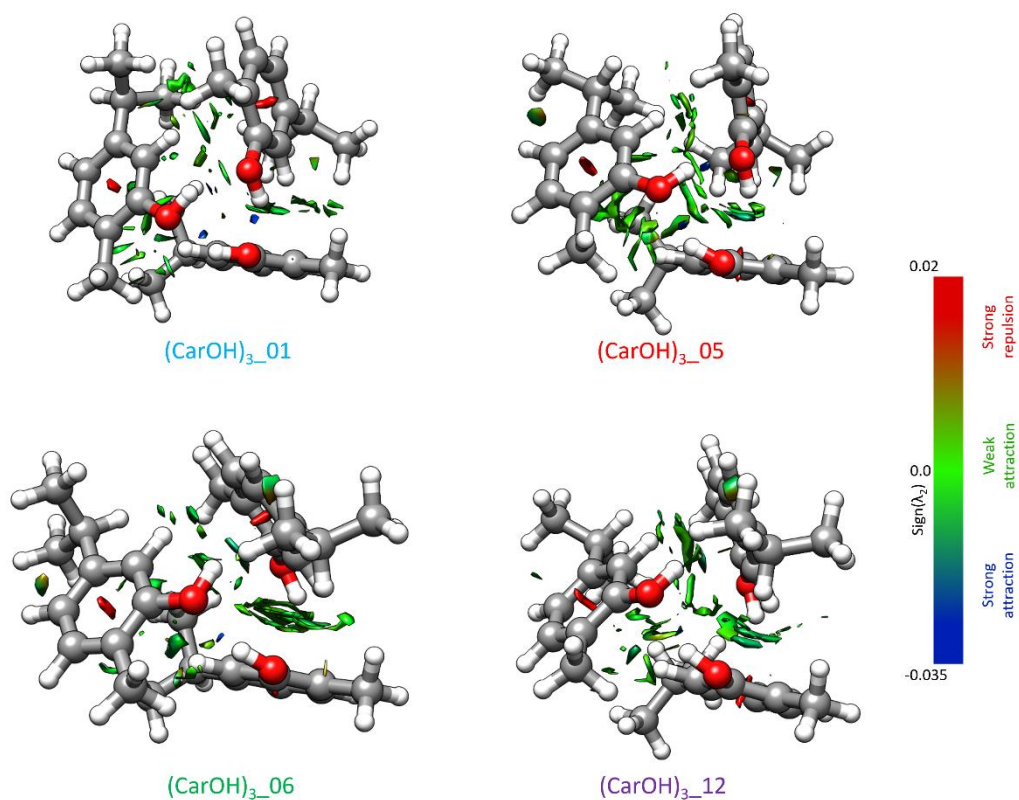

**Figure S13.** NCI plots for four representative  $(\text{carOH})_3$  isomers.  $\lambda_2$  is the second eigenvalue of the electron density Hessian matrix. Its value indicates the type and strength of the interactions. Positive values (red areas) are associated with strong repulsions; negative values (blue areas) are associated with strong attractions; while values close to 0 (green surfaces) indicate the presence of weak interactions. Please note that the colour bar scale is not linear.
